# Supplementary material
Source: Springer Nature journal article supplement (https://www.springermedizin.de/resource/supplementary/13023_2009_193_MOESM8_ESM.pdf/9641832)

●   
2 L 1.82 cm  
1 L 1.89 cm

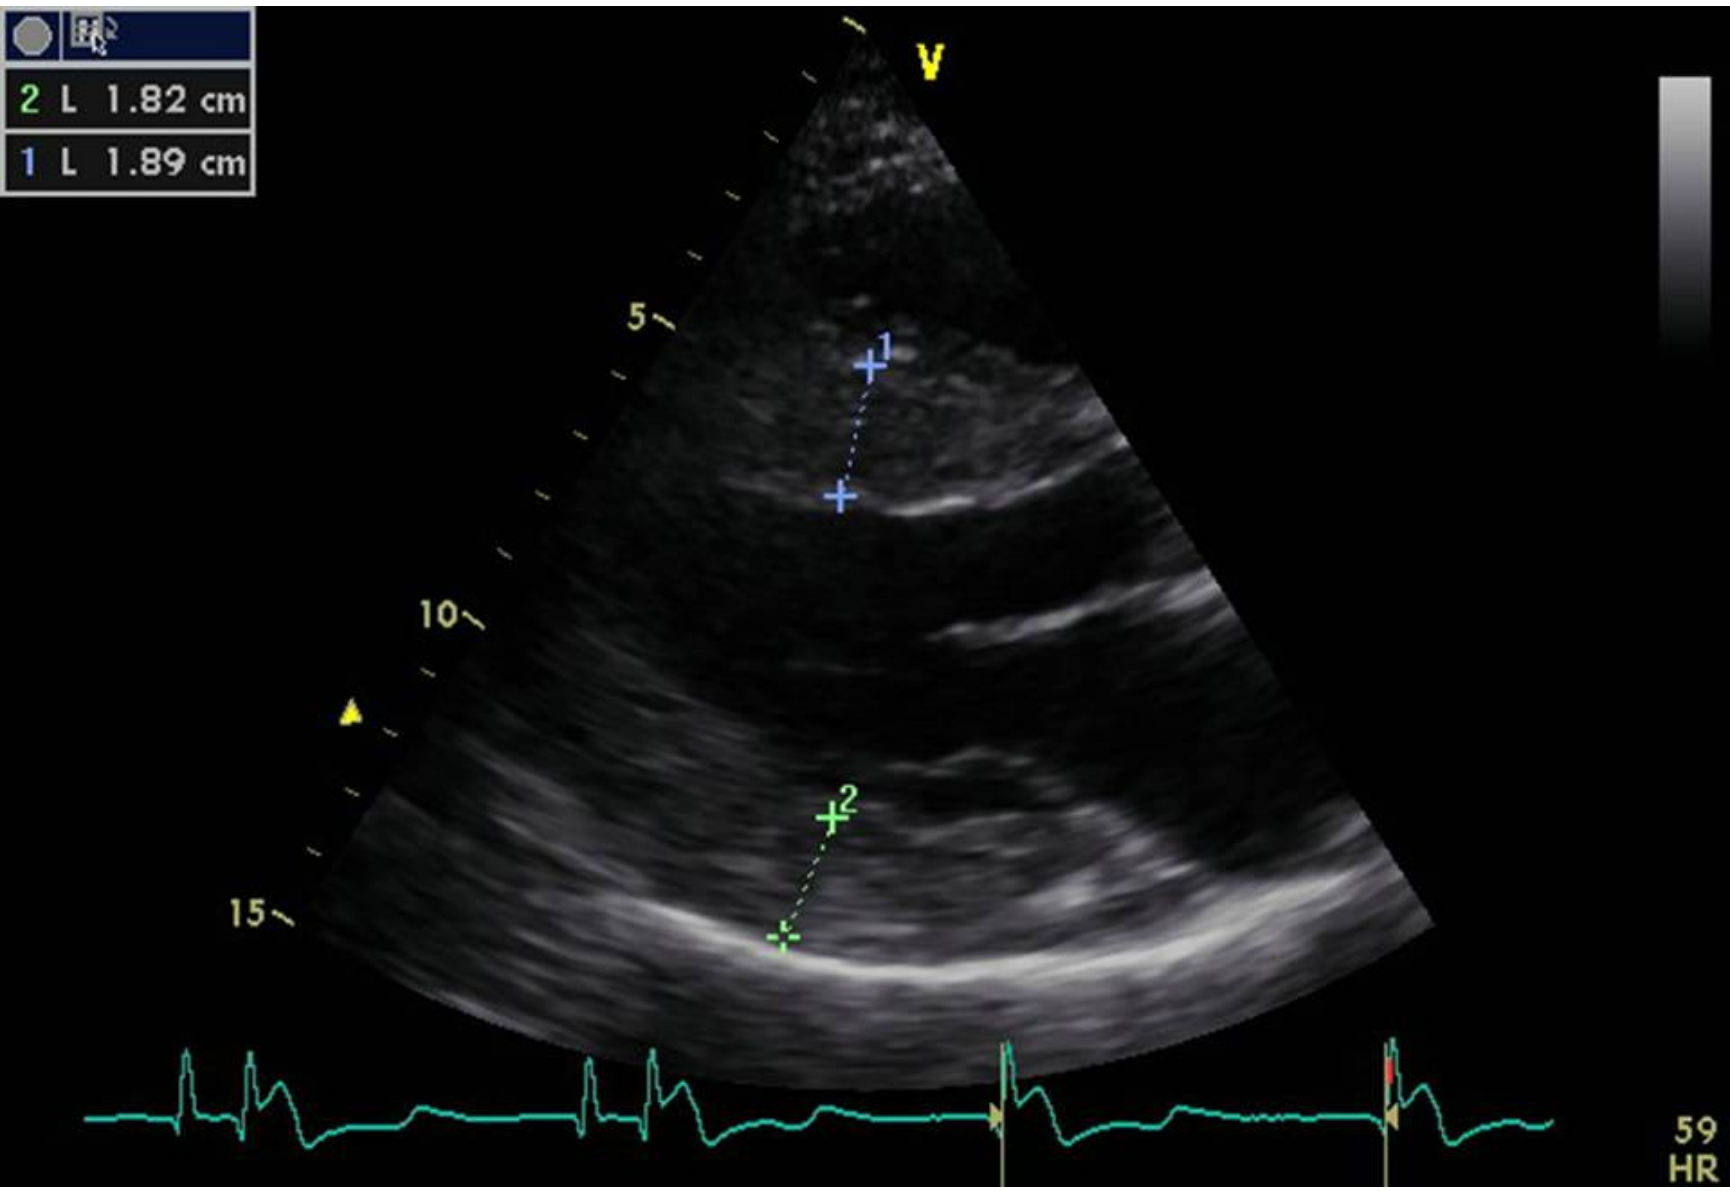

Supplement: MOESM8 [file 9641832]
